# Supplementary material for: A water solvent-assisted condensation polymerization strategy of superhydrophobic lignocellulosic fibers for efficient oil/water separation
Source: Royal Society of Chemistry journal article supplement (doi:10.1039/c9ta04815d), 2019-01-01
Supplement: c9ta04815d1.pdf [file c9ta04815d1.pdf]

Electronic Supplementary Information

**Water Solvent-assisted Condensation Polymerization Strategy of the Superhydrophobic Lignocellulosic Fiber for Efficient Oil/Water Separation**

*Lei Kang, Jinpeng Li , Jinsong Zeng, Wenhua Gao, Jun Xu, Zheng Cheng,\* Kefu Chen and Bin Wang\**

*State Key Laboratory of Pulp and Paper Engineering, Plant micro/nano fiber research center, School of Light Industry and Engineering, South China University of Technology, Guangzhou 510640, China. E-mail: febwang@scut.edu.cn; C.Z24@mail.scut.edu.cn*

**Table S1 A summary of various preparation methods of various (super)hydrophobic oil/water separation materials**

| Main materials                                                              | Method                                | Solvent used                   | Byproduct              | Substrate           | Ref. |
|-----------------------------------------------------------------------------|---------------------------------------|--------------------------------|------------------------|---------------------|------|
| TEOS, OTMS                                                                  | Ultrasound, irradiation               | Ethanol                        | Ethanol, methanol      | Fabric Bag          | 1    |
| MTES                                                                        | Freeze-drying, immerse                | Ethanol                        | Ethanol                | Cellulose aerogels  | 2    |
| MTMS, HDTMS                                                                 | Freeze-drying                         | Ethanol                        | Methanol               | Cellulose aerogels  | 3    |
| MBA, urea, MTCS                                                             | Freeze-drying, vapor deposition       | Water                          | HCl                    | Cellulose aerogels  | 4    |
| OTCS, ClCH <sub>2</sub> COOH, CH <sub>3</sub> COOH                          | Freeze-drying, vapor deposition       | Ethanol, isopropanol, methanol | HCl                    | Cellulose aerogels  | 5    |
| ESO, BDE                                                                    | Freeze-drying, immerse                | n-hexane                       | -                      | Cellulose aerogels  | 6    |
| MDI                                                                         | Freeze-drying, immerse                | Acetone, tert-butanol          | -                      | Cellulose aerogels  | 7    |
| DA·HCl, ODA                                                                 | Freeze-drying                         | Water, tert-butanol            | -                      | Cellulose aerogels  | 8    |
| DADE, POM                                                                   | Freeze-drying                         | NMP, water                     | -                      | BC aerogels         | 9    |
| SiO <sub>2</sub> , DVB, AIBN                                                | Polymerization                        | Ethyl acetate                  | -                      | -                   | 10   |
| NaOH, NaClO <sub>2</sub> , HCl, CH <sub>3</sub> COOH, titanium isopropoxide | Freeze-drying, carbonization          | Ethanol                        | Inorganic matter       | Carbon aerogels     | 11   |
| NaOH, NaClO <sub>2</sub> , HCl, CH <sub>3</sub> COOH                        | Freeze-drying, carbonization          | Water                          | Inorganic matter       | Carbon aerogels     | 12   |
| PP, PTFE                                                                    | Supercritical CO <sub>2</sub> foaming | -                              | -                      | Foam                | 13   |
| TPU, EP, CNTs, hardener                                                     | Freeze-drying                         | 1, 4-dioxane                   | -                      | Foam                | 14   |
| OTCS, APT, HCl                                                              | Immerse                               | Toluene, ethanol, acetone      | HCl                    | PU sponge           | 15   |
| TEOS, MTMS, TMCS                                                            | Irradiation                           | Ethanol, methanol              | Ethanol, methanol, HCl | Polyurethane sponge | 16   |
| SA, HCl, thiourea                                                           | Immerse                               | Ethanol                        | -                      | Copper mesh         | 17   |
| CA, NaOH                                                                    | 3D-printed                            | Ethyl acetate, methanol        | -                      | Cellulose mesh      | 18   |
| ZnO, DFTMS, PS                                                              | Hydrothermal reaction, dip-coating    | Ethanol, THF                   | Methanol               | Cotton              | 19   |
| PEI, SAcl, ODA                                                              | Dip-coating/immerse                   | Ethanol, THF                   | -                      | Cotton              | 20   |

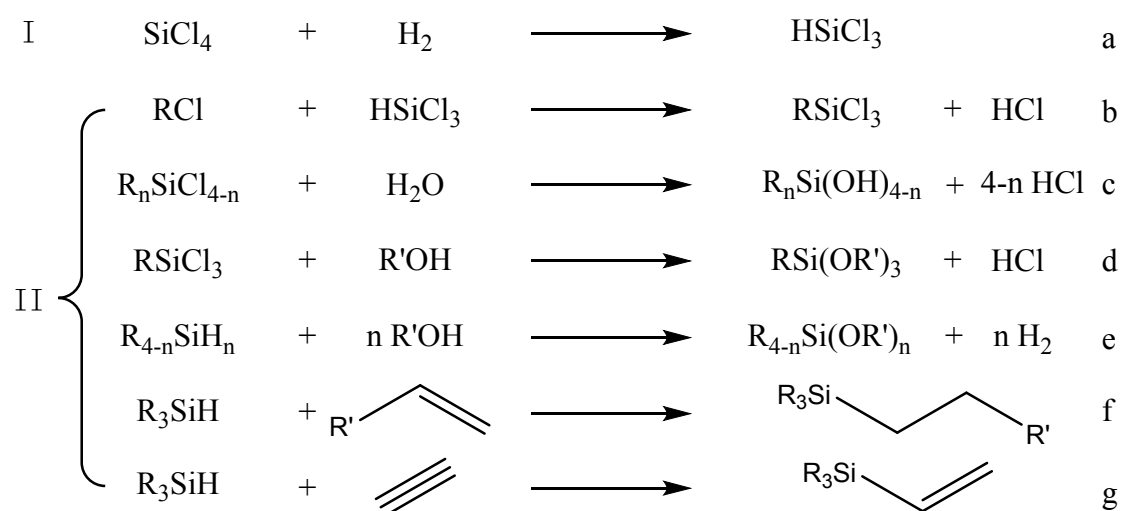

R, R' = alkyl, aryl, alkoxy, vinyl, etc.

**Scheme S1** Method for preparing silane coupling agent

As shown in Table S1, the low surface energy materials mainly were used in the superhydrophobic treatment in the form of foam, sponge, aerogels, and mesh materials for oil/water separation. The above materials are treated with various silane coupling agents which are assisted by organic solvents or inorganic nanoparticles as well. These processes are accompanied by the production of all kinds of by-products (hydrochloric acid, alcohols, and inorganics). Meanwhile, the oil/water separation materials of originated from biomass substrates are normally made into various cellulose aerogels or carbon aerogels. The preparation of micro-nanocellulose is energy-intensive, and the further freeze-drying process is also high energy-consuming. Thus it is difficult to expand on a large scale. In addition, the raw materials used for foam and sponge are difficult to degrade. The chemical reaction formula for the preparation of various silane coupling agents commonly used for (super) hydrophobic surfaces are given in Scheme S1.<sup>21-28</sup> The preparation of silane coupling agents is generally high energy consumption and heavy pollution. Based on the above reasons, it is necessary to develop more effective, environmentally friendly, bulky and cheap chemicals to (super) hydrophobicize the surface of materials.

---

| <b>Abbreviation</b> |                                                  |
|---------------------|--------------------------------------------------|
| TEOS                | Tetraethylorthosilicate                          |
| OTMS                | Octadecyltrimethoxysilane                        |
| SA                  | Stearic acid                                     |
| TPU                 | Thermoplastic polyurethane                       |
| EP                  | Epoxy resin                                      |
| ESO                 | epoxidized soybean oil                           |
| MTCS                | Methyltrichlorosilane                            |
| CNTs                | Carbon nanotubes                                 |
| PDMS                | Poly(dimethylsiloxane) trimethylsiloxyterminated |
| DA·HCl              | Dopamine hydrochloride                           |
| TMCS                | Trimethylchlorosilane                            |
| BDE                 | 1,4-butanediol diglycidyl ether                  |
| ODA                 | Octadecylamine                                   |
| HDTMS               | Hexadecyltrimethoxysilane                        |
| MTMS                | Methyltrimethoxysilane                           |
| OTCS                | Octyltrichlorosilane                             |
| PP                  | Polypropylene                                    |
| PTFE                | Polytetrafluoroethylene                          |
| DADE                | 4,4'-Diaminodiphenyl ether                       |
| DFTMS               | Dodecafluoroheptyl-propyl-trimethoxysilane       |
| PS                  | Polystyrene                                      |
| PVA                 | Poly(vinyl alcohol)                              |
| POM                 | Paraformaldehyde                                 |
| CA                  | Cellulose acetate                                |
| PU                  | Polyurethane                                     |
| MDI                 | methylene diphenyl diisocyanate                  |
| MBA                 | N,N'-methylenebisacrylamide                      |
| OTCS                | Octadecyltrichlorosilane                         |
| APT                 | Attapulgate                                      |
| 5AcI                | Dipentaerythritol penta-/hexa-acrylate           |
| BC                  | Cacterial cellulose                              |
| PEI                 | branched poly(ethyleneimine)                     |
| DVB                 | Divinylbenzene                                   |
| AIBN                | Azodiisobutyronitrile                            |

---

### UV Irradiation tests

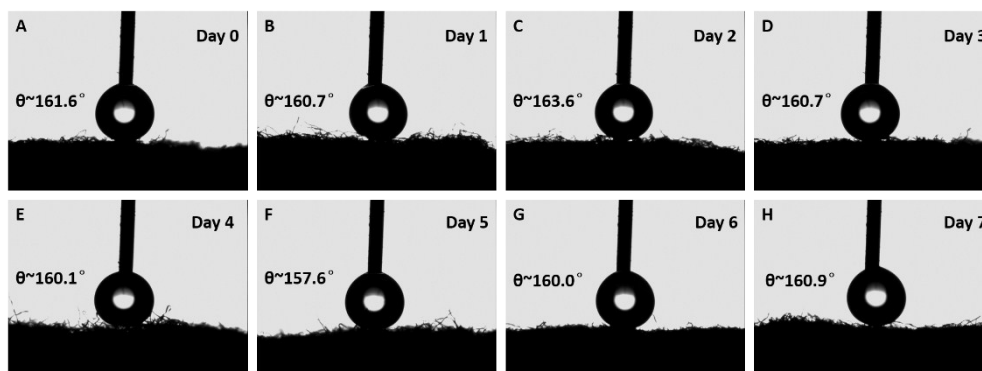

**Supplementary Figure S6.** UV Irradiation tests. (A-H) The OMF lignocellulosic fiber was exposed to ultra-violet (UV) radiations of both shorter (254 nm) as well as longer (365 nm) wavelengths for 168 hours.

### Filtration recycle tests

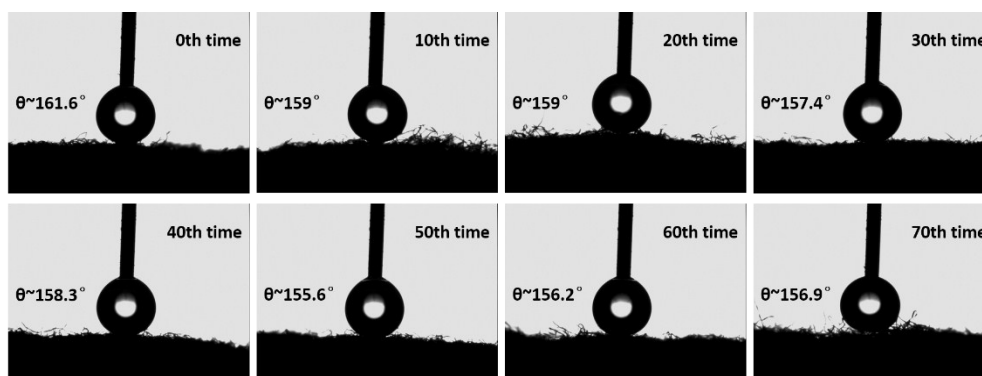

**Supplementary Figure S6.** Filtration recycle tests. The contact angle images illustrating the separation of a complex oil/water mixture that consists of heavy oil (25 mL of DCM) and water (25 mL) for repetitive use in gravity-driven filtration of an oil/water mixture at least 70 times, through gravity-driven filtration using OMF lignocellulosic fiber.

---

### Movie S1

Illustrating the separation of floating droplets of motor oil by using OMF lignocellulosic fiber. 0.5 mL of oil was placed on the air/water interface in a Petri dish, then the treated pulp was placed on the water surface and the OMF lignocellulosic fiber selectively absorbed the oil from the oil/water interface within 30 seconds.

### Movie S2

Illustrating the separation of floating droplets of motor oil by using original lignocellulosic fiber. 0.5 mL of oil was placed on the air/water interface in a Petri dish. The original lignocellulosic pulp could not absorb any trace of the floating oil droplets, but the original lignocellulosic pulp absorbed water quickly and became wet. The wet lignocellulosic pulp could not absorb any trace of the moving oil droplets on the air/water interface because of repellence effect.

### Movie S3

Illustrating the successful collection/separation of heavy model-oil (DCM) under water (red colour aids visual inspection) using the OMF lignocellulosic fiber.

### Movie S4

**Illustrating the original lignocellulosic fiber was unsuitable for collecting oil under water but was for collecting the aqueous phase (red colour) selectively.**Movie S5

Oil/water separation tests. Illustrating the separation of a complex oil/water mixture that consists of heavy oil (25 mL of DCM, colourless) and water (25 mL, red colour) through gravity-driven filtration using OMF lignocellulosic fibers.

### Movie S6

Antifouling tests. 1. Illustrating the OMF lignocellulosic fibers were inserted into MnO<sub>2</sub> dyed water, the OMF lignocellulosic fibers did not get dyed due to the antifouling properties. 2. Showing that fast flowing K<sub>2</sub>MnO<sub>4</sub> dyed water did not stain the OMF lignocellulosic fibers which were pasted on the “double-sided tape” substrates.

### Movie S7

Illustrating the successful collection/separation of heavy model-oil (20 mL of DCM, colorless) under water (20 mL red colour aids visual inspection) using the OMF cotton fabric.

## References

1. J. Li, L. Yan, X. Tang, H. Feng, D. Hu and F. Zha, *Adv. Mater. Interfaces*, 2016, **3**, 1500770.
2. S. Zhou, P. Liu, M. Wang, H. Zhao, J. Yang and F. Xu, *ACS Sustainable Chemistry & Engineering*, 2016, **4**, 6409-6416.
3. O. Laitinen, T. Suopajarvi, M. Österberg and H. Liimatainen, *ACS Appl. Mater. Interfaces*, 2017, **9**, 25029-25037.
4. Q. Liao, X. Su, W. Zhu, W. Hua, Z. Qian, L. Liu and J. Yao, *RSC Adv.*, 2016, **6**, 63773-63781.
5. N. T. Cervin, C. Aulin, P. T. Larsson and L. Wågberg, *Cellulose*, 2012, **19**, 401-410.
6. X. Xu, F. Dong, X. Yang, H. Liu, L. Guo, Y. Qian, A. Wang, S. Wang and J. Luo, *J. Agric. Food. Chem.*, 2019, **67**, 637-643.

- 
7. F. Jiang and Y.-L. Hsieh, *ACS Appl. Mater. Interfaces*, 2017, **9**, 2825-2834.
  8. R. Gao, S. Xiao, W. Gan, Q. Liu, H. Amer, T. Rosenau, J. Li and Y. Lu, *ACS Sustainable Chem. Eng.*, 2018, **6**, 9047-9055.
  9. Z. Li, J. Qiu, Y. Shi and C. Pei, *Cellulose*, 2018, **25**, 2987-2996.
  10. Y. Li, Z. Zhang, B. Ge, X. Men and Q. Xue, *Green Chem.*, 2016, **18**, 5266-5272.
  11. D. Yuan, T. Zhang, Q. Guo, F. Qiu, D. Yang and Z. Ou, *Industrial & Engineering Chemistry Research*, 2018, **57**, 14758-14766.
  12. Y. Liu, Y. Peng, T. Zhang, F. Qiu and D. Yuan, *Cellulose*, 2018, **25**, 3067-3078.
  13. H.-Y. Mi, X. Jing, Y. Liu, L. Li, H. Li, X.-F. Peng and H. Zhou, *ACS Appl. Mater. Interfaces*, 2019, **11**, 7479-7487.
  14. X. Cao, Y. Zhou, X. Wei, W. Zhai, G. Zheng, K. Dai, C. Liu and C. Shen, *Polym. Test.*, 2018, **72**, 86-93.
  15. J. Li, C. Xu, Y. Zhang, R. Wang, F. Zha and H. She, *J. Mater. Chem. A*, 2016, **4**, 15546-15553.
  16. M. Li, H. Jiang and D. Xu, *Mater. Res. Express*, 2018, **5**, 045003.
  17. M. Khosravi, S. Azizian and R. Boukherroub, *Sep. Purif. Technol.*, 2019, **215**, 573-581.
  18. J. J. Koh, G. J. H. Lim, X. Zhou, X. Zhang, J. Ding and C. He, *ACS Appl. Mater. Interfaces*, 2019, **11**, 13787-13795.
  19. Y. Qing, Y. Zheng, C. Hu, Y. Wang, Y. He, Y. Gong and Q. Mo, *Applied Surface Science*, 2013, **285**, 583-587.
  20. A. M. Rather, N. Jana, P. Hazarika and U. Manna, *Journal of Materials Chemistry A*, 2017, **5**, 23339-23348.
  21. J. Li and D. Li, *Guangdong Chemical Industry*, 2016.
  22. Y. S. Cho, S. Kang, J. S. Han, B. R. Yoo and I. N. Jung, *Journal of the American Chemical Society*, 2001, **123**, 5584-5585.
  23. C. A. Schlecht, D. M. Johnson and J. A. Maurer, *RSC Advances*, 2013, **3**.
  24. I. Buslov, F. Song and X. Hu, *Angew Chem Int Ed Engl*, 2016, **55**, 12295-12299.
  25. F. Deng, X. U. Shaohua, Y. Wen, L. I. Weifan and F. Li, *Chemical Industry & Engineering Progress*, 2008, **27**, 112-115.
  26. C. Rücker and K. Kümmerer, *Chem. Rev.*, 2015, **115**, 466-524.
  27. J. Kurjata, K. Rozgawijas and W. A. Stanczyk, *European Journal of Chemistry*, 2013, **4**, 343-349.
  28. Y. Fujimoto, A. Shimojima and K. Kuroda, *Chem. Mater.*, 2003, **15**, 4768-4774.
